# Supplementary material for: Imperatorin ameliorates pulmonary fibrosis via GDF15 expression
Source: PubMed Central journal article supplement (PMC10725920; doi:10.3389/fphar.2023.1292137), 2023-12-04
Supplement: DataSheet1.pdf [file DataSheet1.pdf]

| <b>Antibody</b>     | <b>Cat. No</b> | <b>Brand</b>                   |
|---------------------|----------------|--------------------------------|
| $\alpha$ -SMA       | ab5694         | Abcam (Cambridge, UK)          |
| $\alpha$ -tubulin   | T5168          | Sigma-Aldrich (St. Louise, MO) |
| $\beta$ -actin      | A5441          | Sigma-Aldrich (St. Louise, MO) |
| Collagen type I     | 600-403-103    | Rockland (Limerick, PA)        |
| CTGF                | ab6992         | Abcam (Cambridge, UK)          |
| GAPDH               | G8795          | Sigma-Aldrich (St. Louise, MO) |
| p-LKB1              | 3482           | Cell Signaling (Danvers, MA)   |
| p-AMPK              | 2535           | Cell Signaling (Danvers, MA)   |
| p-CREB              | SC-81486       | Santa Cruz (Santa Cruz, CA)    |
| Anti-mouse IgG-HRP  | SC-2005        | Santa Cruz (Santa Cruz, CA)    |
| Anti-rabbit IgG-HRP | SC-2004        | Santa Cruz (Santa Cruz, CA)    |

|                          |            |                        |
|--------------------------|------------|------------------------|
| GDF15 ELISA (Mouse)      | Ab216947   | Abcam (Cambridge, UK)  |
| GDF15 ELISA (Human)      | Ab155432   | Abcam (Cambridge, UK)  |
| Hydroxyproline assay kit | Abx298833  | Abbexa (Cambridge, UK) |
| LOX activity assay kit   | Ab112139   | Abcam (Cambridge, UK)  |
| SIRT1 activity assay kit | ab156065   | Abcam (Cambridge, UK)  |
| TGase 2 assay kit        | NBP1-37008 | Novus (Centennial, CO) |

| <b>Chemical</b>               | <b>Cat. No</b> | <b>Brand</b>                                |
|-------------------------------|----------------|---------------------------------------------|
| AICAR                         | SC-200659A     | Santa Cruz (Santa Cruz, CA)                 |
| Ara-A                         | CDS020711      | Sigma-Aldrich (St. Louise, MO)              |
| Bleomycin                     | Ab142977       | Abcam (Cambridge, UK)                       |
| CAY10591                      | 839699-72-8    | Cayman Chemicals (Ann Arbor, MI)            |
| Compound C                    | 171260         | Sigma-Aldrich (St. Louise, MO)              |
| EX527                         | 49843-98-3     | Cayman Chemicals (Ann Arbor, MI)            |
| Imperatorin                   | 482-44-0       | ChemFaces (Hubei, People Republic of China) |
| Recombinant mouse GDF15       | NBP2-51921     | Novus (Centennial, CO)                      |
| Recombinant human TGF $\beta$ | 100-21         | Peptotech (Cranbury, NJ)                    |
| Zymosan                       | Z4250          | Sigma-Aldrich (St. Louise, MO)              |
| 666-15                        | 538341         | Sigma-Aldrich (St. Louise, MO)              |

**Supplementary Figure 1. Antibodies and chemicals used in this study.**

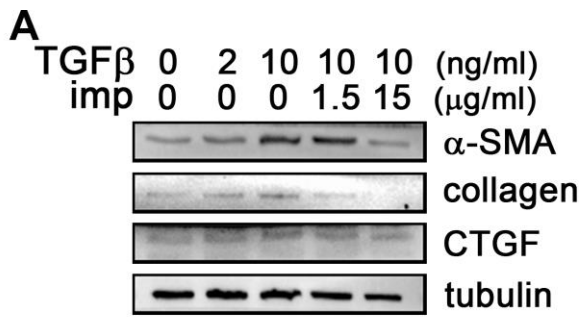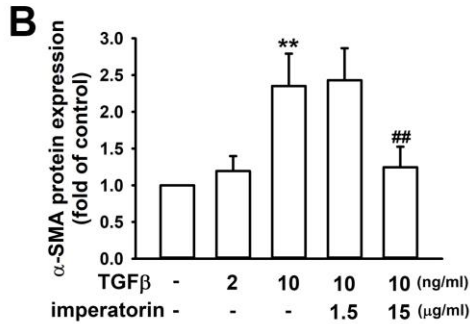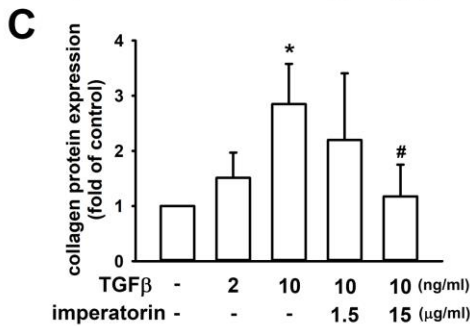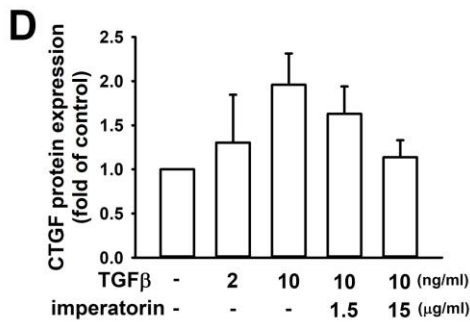

**Supplementary Figure 2. Imperatorin reduces TGFβ-induced pro-fibrotic response in MRC-5 fibroblasts.**

Representative images of protein expressions are shown in (A). Imperatorin (imp, 1.5 or 15 μg/ml) was administered 30 minutes before TGFβ (2 or 10 ng/ml) stimulation. 24 hours later, protein expressions of  $\alpha$ -SMA (B), collagen (C), and CTGF (D) in MRC-5 fibroblasts were examined by Western Blotting. Graphs showed mean  $\pm$  S.D. of three independent experiments. *p* value was calculated using one-way ANOVA and multiple comparison procedures (Holm-Sidak). \**p* < 0.05; \*\**p* < 0.01 compared to control group. #*p* < 0.05; ##*p* < 0.01 compared to TGFβ-treated group.
